# Supplementary material for: Determining Levers of Cost-effectiveness for Screening Infants at High Risk for Peanut Sensitization Before Early Peanut Introduction
Source: PubMed Central journal article supplement (PMC6991237; doi:10.1001/jamanetworkopen.2019.18041), 2019-12-20
Supplement: jamanetwopen-2-e1918041-s001.pdf [file jamanetwopen-2-e1918041-s001.pdf]

## Supplementary Online Content

Greenhawt M, Shaker M. Determining levers of cost-effectiveness for screening infants at high risk for peanut sensitization before early peanut introduction. *JAMA Netw Open*. 2019;2(12):e1918041. doi:10.1001/jamanetworkopen.2019.18041

**eTable.** NIAID Addendum Guidelines for Early Peanut Introduction

**eFigure 1.** Deterministic Sensitivity Analyses

**eFigure 2.** Cost-effectiveness Acceptability

This supplementary material has been provided by the authors to give readers additional information about their work.

eTable. NIAID Addendum Guidelines for Early Peanut Introduction

| <b>Addendum Guideline</b> | <b>Infant Criteria</b>             | <b>Recommendations</b>                                                                                                                             | <b>Earliest Recommended Age of Peanut Introduction</b>                                                     |
|---------------------------|------------------------------------|----------------------------------------------------------------------------------------------------------------------------------------------------|------------------------------------------------------------------------------------------------------------|
| 1                         | Severe eczema, egg allergy or both | Strongly consider evaluation by sIgE and/or SPT, and if necessary an oral food challenge. Based on test results, introduce peanut containing foods | 4 to 6 months                                                                                              |
| 2                         | Mild to moderate eczema            | Introduce peanut-containing foods                                                                                                                  | Around 6 months                                                                                            |
| 3                         | No eczema or any food allergy      | Introduce peanut-containing foods                                                                                                                  | Timing of introduction is age appropriate and in accordance with family preferences and cultural practices |

eFigure 1. Deterministic Sensitivity Analyses

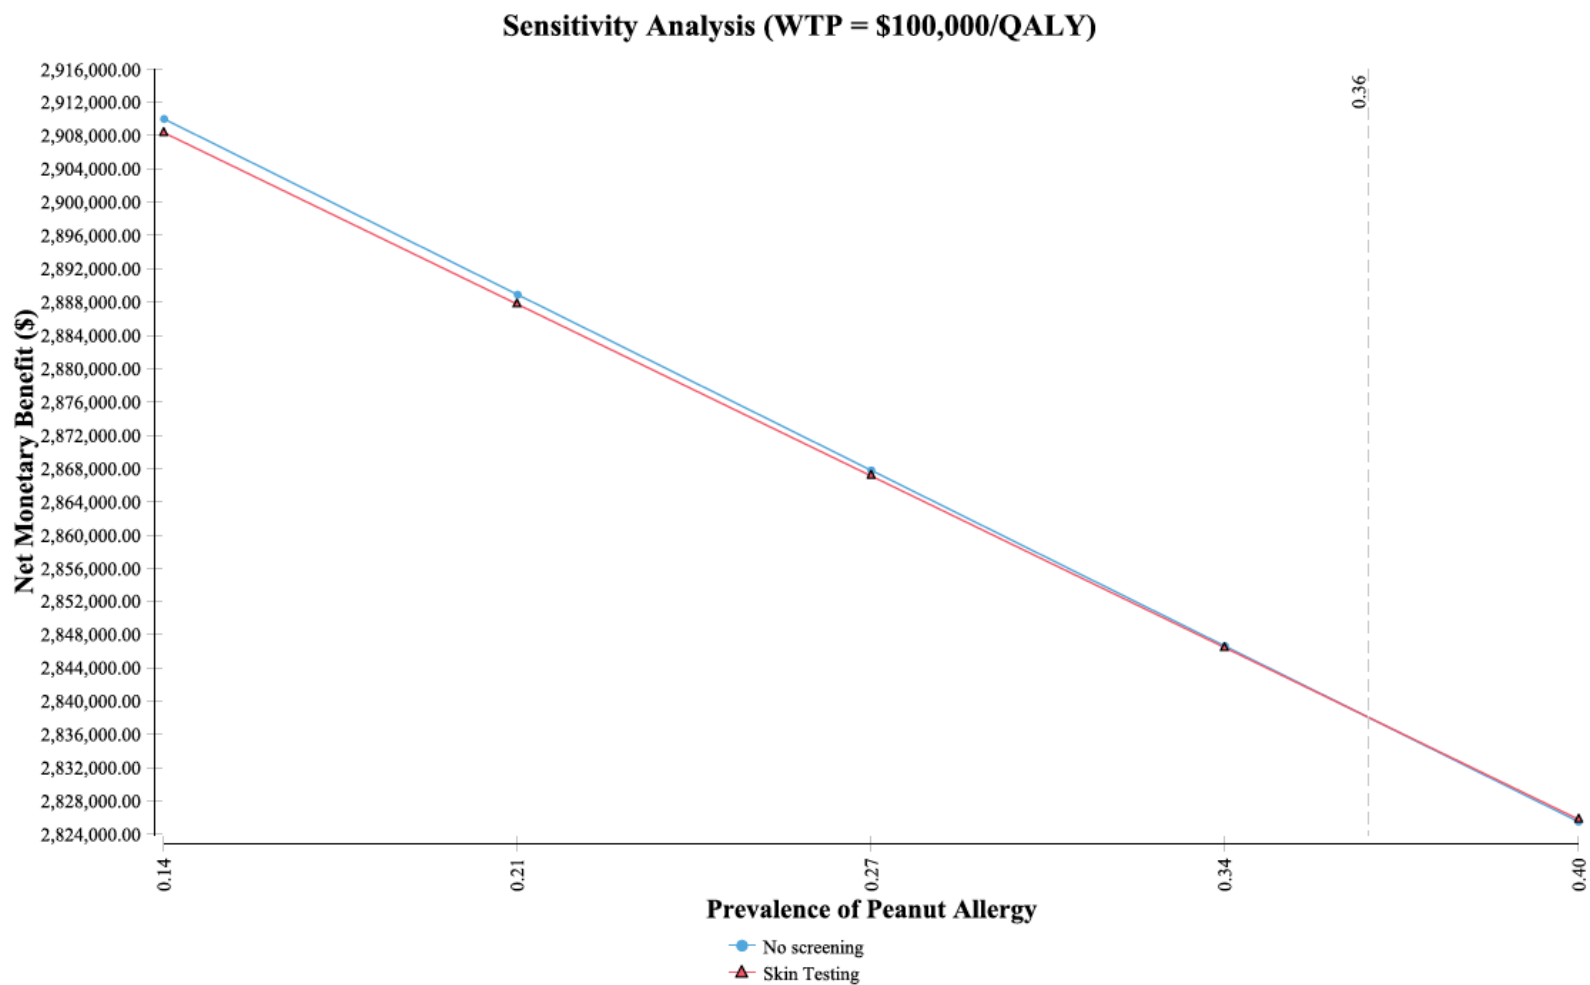

One-way sensitivity analysis of peanut allergy prevalence at equivalent rates and disutilities of index and accidental anaphylaxis rates with SPT sensitivity of 0.85 and specificity of 0.99.

eFigure 2. Cost-effectiveness Acceptability

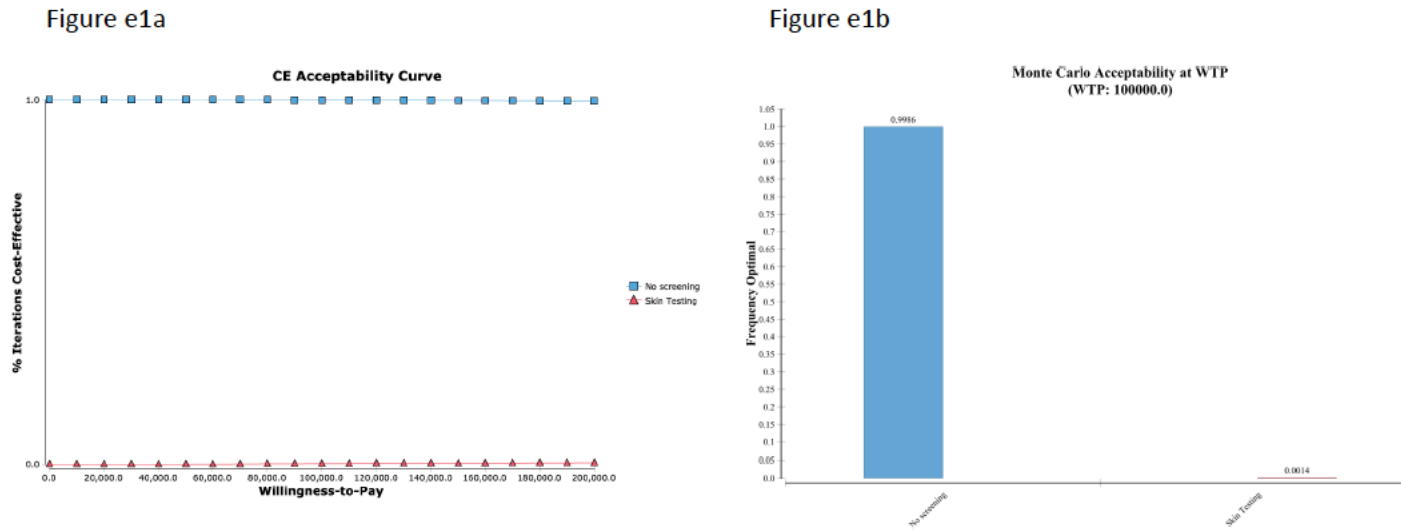

In probabilistic sensitivity analyses over a 20 year horizon (n=10,000) a skin test screening strategy was not cost-effective in 99.9% of simulations (WTP = \$100,000/QALY)
